# Supplementary material for: Differential gene expression analysis of HNSCC tumors deciphered tobacco dependent and independent molecular signatures
Source: PubMed Central journal article supplement (PMC6817442; doi:10.18632/oncotarget.27249), 2019-10-22
Supplement: oncotarget-10-6168-s001.pdf [file oncotarget-10-6168-s001.pdf]

## Differential gene expression analysis of HNSCC tumors deciphered tobacco dependent and independent molecular signatures

### SUPPLEMENTARY MATERIALS

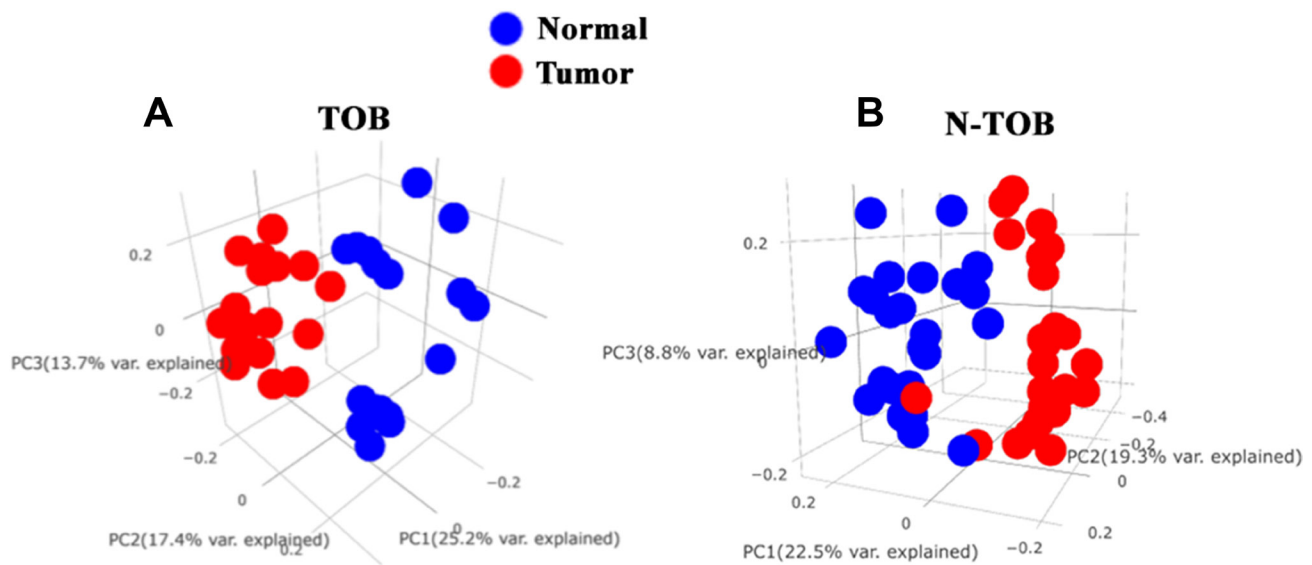

**Supplementary Figure 1: Principal Component Analysis results.** The figure displays an interactive, three-dimensional scatter plot of the first three Principal Components (PCs) of the data. Each point represents an RNA-seq sample. Samples with similar gene expression profiles are closer in the three-dimensional space. Point highlighted with red and blue colour are Tumor and normal control respectively.

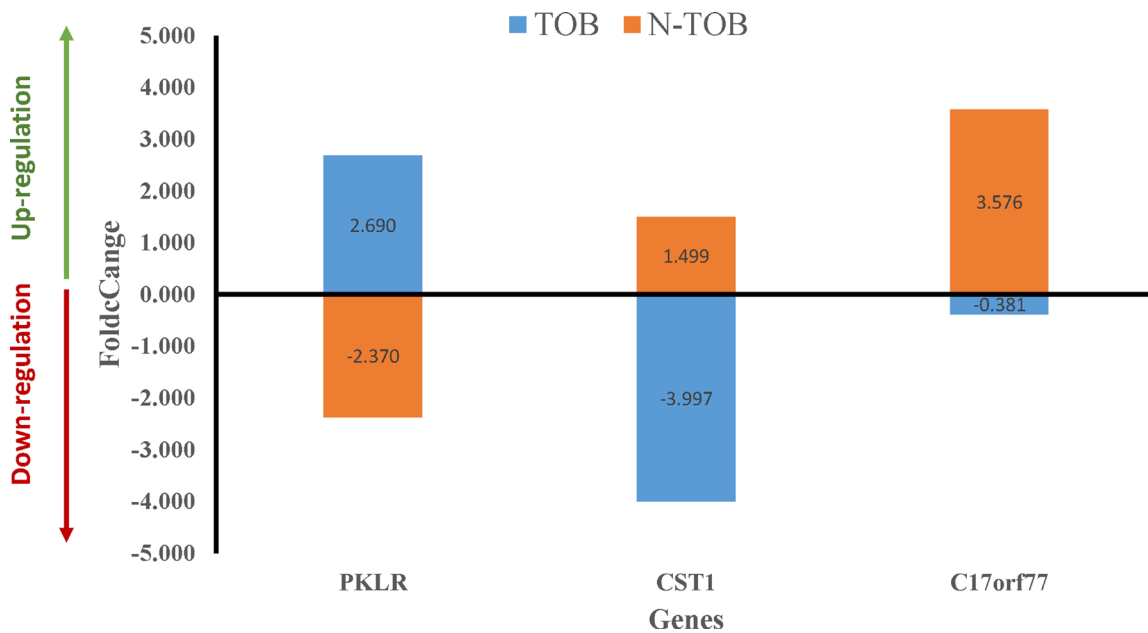

**Supplementary Figure 2: Validation of differential gene expression pattern of key genes in both TOB and N-TOB tumors on non-matched tumors.** Foldchange change values of genes showing opposite regulation of the same gene in between TOB and N-TOB tumors.

**Supplementary Table 1: List of DEGs ( $\text{padj (FDR)} < 0.05$ ,  $\text{Log}_2\text{Foldchange} > 2$ ) identified in matched tumors of smokers patients.** See Supplementary Table 1

**Supplementary Table 2: List of DEGs ( $\text{padj (FDR)} < 0.05$ ,  $\text{Log}_2\text{Foldchange} > 2$ ) identified in matched tumors of non-smokers patients.** See Supplementary Table 2

**Supplementary Table 3: List of DEGs ( $\text{padj (FDR)} < 0.05$ ,  $\text{Log}_2\text{Foldchange} > 1$ ) identified in non-matched tumors of smokers patients. Genes highlighted with yellow background is the also identified in matched tumors ( $\text{padj (FDR)} < 0.05$ ,  $\text{Log}_2\text{Foldchange} > 1$ ).** See Supplementary Table 3

**Supplementary Table 4: List of DEGs ( $\text{padj (FDR)} < 0.05$ ,  $\text{Log}_2\text{Foldchange} > 1$ ) identified in non-matched tumors of non-smokers patients. Genes highlighted with yellow background is the also identified in matched tumors ( $\text{padj (FDR)} < 0.05$ ,  $\text{Log}_2\text{Foldchange} > 1$ )** See Supplementary Table 4
